# Supplementary material for: Double-spiral as a bio-inspired functional element in engineering design
Source: Springer Nature journal article supplement (doi:10.1038/s41598-024-79630-6), 2024-11-25
Supplement: MOESM1 [file 41598_2024_79630_MOESM1_ESM.pdf]

# **Double-spiral as a bio-inspired functional element in engineering design**

Mohsen Jafarpour<sup>1</sup>, Mohammad Aryayi<sup>2</sup>, Stanislav N. Gorb<sup>1</sup> & Hamed Rajabi<sup>3, 4</sup>

<sup>1</sup> Functional Morphology and Biomechanics, Institute of Zoology, Kiel University, 24118 Kiel, Germany

<sup>2</sup> University of Burgundy, 21000 Dijon, France

<sup>3</sup> Division of Mechanical Engineering and Design, School of Engineering, London South Bank University, London SE1 0AA, UK

<sup>4</sup> Mechanical Intelligence Research Group, School of Engineering, London South Bank University, London SE1 0AA, UK

## Supplementary data

### I) Double-Spiral Design software

Please download “Software.zip” and run the file “DSD.exe” to open the Double-Spiral Design software. Using this software you can develop your own double-spiral models.

### II) Models

3D models of the spiral-based structures presented in this study.

### III) Videos

**Video S1.** Freeform passive gripper being used for grasping objects of various shapes and masses. We added small magnets (Neodymium Rare Earth Magnets, 3×1.5 mm) to the outer surface of the double-spiral loop and created a magnetic gripper for picking up five random objects.

**Video S2a.** High reversible extension of the three-jaw enveloping gripper. The area inside the gripper can be remarkably increased, and when released, the double-spiral gripper returns to its original coiled state.

**Video S2b.** Highly extensible enveloping gripper being used for gripping objects of various shapes and masses.

**Video S3.** Mechanical behavior of the spiral-based interlocking structure. The results show that the pulling force is more than 40 times the pushing force.

**Video S4.** Deformation of the spiral-based modular structures under different loading scenarios. Double-spirals were used as compliant joints to develop modular structures with different shapes and mechanical behavior.

## IV) Tables

**Table S1.** 3D printing settings.

| Filament                   | Thermoplastic polyurethane<br>(Flexfill TPU 98A)    | Polylactic acid<br>(PLA)                 |
|----------------------------|-----------------------------------------------------|------------------------------------------|
| Produced by                | Fillamentum addi(c)tive polymers,<br>Czech Republic | Prusa Research, Praha,<br>Czech Republic |
| Filament diameter (mm)     | 1.75                                                | 1.75                                     |
| Nozzle diameter (mm)       | 0.4                                                 | 0.4                                      |
| Extrusion temperature (°C) | 240                                                 | 215                                      |
| Bed temperature (°C)       | 50                                                  | 60                                       |
| Layer height (mm)          | 0.2                                                 | 0.3                                      |
| Fill pattern               | Gyroid                                              | Gyroid                                   |
| Fill density (%)           | 20                                                  | 50                                       |

**Table S2.** Design parameters of the logarithmic double-spirals which were employed in this study.

| Developed<br>mechanical system              | Design parameter       |                                                   |                                                           |                          |
|---------------------------------------------|------------------------|---------------------------------------------------|-----------------------------------------------------------|--------------------------|
|                                             | Polar slope<br>[ $k$ ] | Initial thickness<br>[ $r_{0,2} - r_{0,1}$ ] (mm) | Angle of rotation<br>[ $\theta_{\max} - \theta_0$ ] (rad) | Extrusion height<br>(mm) |
| Freeform<br>passive gripper                 | 0.20                   | 1.5<br>(7.0-5.5)                                  | $1.5\pi$                                                  | 20                       |
| Highly extensible<br>enveloping gripper     | 0.07                   | 2.0<br>(15.0-13.0)                                | $2.5\pi$                                                  | 40                       |
| Mechanical<br>interlocking<br>structure     | 0.10                   | 1.4<br>(11.6-10.2)                                | $3.0\pi$                                                  | 20                       |
|                                             | 0.10                   | 4.8<br>(13.7-8.9)                                 | $3.0\pi$                                                  | 20                       |
| Adaptive<br>energy-dissipative<br>structure | 0.10                   | 1.0<br>(12.0-11.0)                                | $2.0\pi$                                                  | 20                       |
|                                             | 0.10                   | 2.0<br>(12.0-10.0)                                | $2.0\pi$                                                  | 20                       |
|                                             | 0.10                   | 3.0<br>(12.0-9.0)                                 | $2.0\pi$                                                  | 20                       |
| Compliant<br>planar joint                   | 0.20                   | 2.5<br>(15.0-12.5)                                | $1.5\pi$                                                  | 5                        |

**Table S3.** Extension of the low, medium, high, and adaptive stiffness structures under tensile forces, along with the corresponding energy dissipation due to their deformation.

| Loading rate: 1 mm/s     |                     |                   |       |        |        |        |        |         |
|--------------------------|---------------------|-------------------|-------|--------|--------|--------|--------|---------|
| Measured parameter       | Developed structure | Applied force (N) |       |        |        |        |        |         |
|                          |                     | 0.5               | 1.0   | 5.0    | 10.0   | 14.0   | 18.0   | 22.0    |
| Extension (mm)           | Low stiffness       | 39.37             | 96.49 |        |        |        |        |         |
|                          | Medium stiffness    | 5.74              | 12.20 | 107.68 | 238.70 |        |        |         |
|                          | High stiffness      | 1.00              | 2.04  | 9.38   | 24.40  | 60.45  | 105.68 | 213.73  |
|                          | Adaptive stiffness  | 19.13             | 43.74 | 115.50 | 178.68 | 190.34 | 208.09 |         |
| Dissipated energy (N.mm) | Low stiffness       | 7.67              | 39.00 |        |        |        |        |         |
|                          | Medium stiffness    | 1.02              | 4.41  | 210.85 | 543.73 |        |        |         |
|                          | High stiffness      | 0.18              | 0.72  | 16.12  | 96.54  | 362.77 | 750.17 | 1403.28 |
|                          | Adaptive stiffness  | 3.57              | 14.38 | 107.38 | 298.15 | 380.16 | 547.74 |         |
| Loading rate: 10 mm/s    |                     |                   |       |        |        |        |        |         |
| Measured parameter       | Developed structure | Applied force (N) |       |        |        |        |        |         |
|                          |                     | 0.5               | 1.0   | 5.0    | 10.0   | 14.0   | 18.0   | 22.0    |
| Extension (mm)           | Low stiffness       | 30.25             | 72.46 |        |        |        |        |         |
|                          | Medium stiffness    | 4.20              | 8.09  | 51.03  | 232.41 |        |        |         |
|                          | High stiffness      | 1.35              | 2.15  | 7.65   | 16.75  | 31.22  | 65.13  | 100.29  |
|                          | Adaptive stiffness  | 12.52             | 28.79 | 100.60 | 139.33 | 181.71 | 191.19 |         |
| Dissipated energy (N.mm) | Low stiffness       | 5.58              | 27.56 |        |        |        |        |         |
|                          | Medium stiffness    | 0.81              | 2.88  | 96.24  | 605.41 |        |        |         |
|                          | High stiffness      | 0.34              | 0.87  | 12.27  | 59.41  | 165.53 | 464.32 | 811.31  |
|                          | Adaptive stiffness  | 2.23              | 10.45 | 88.62  | 249.80 | 379.14 | 456.13 |         |

## V) Figures

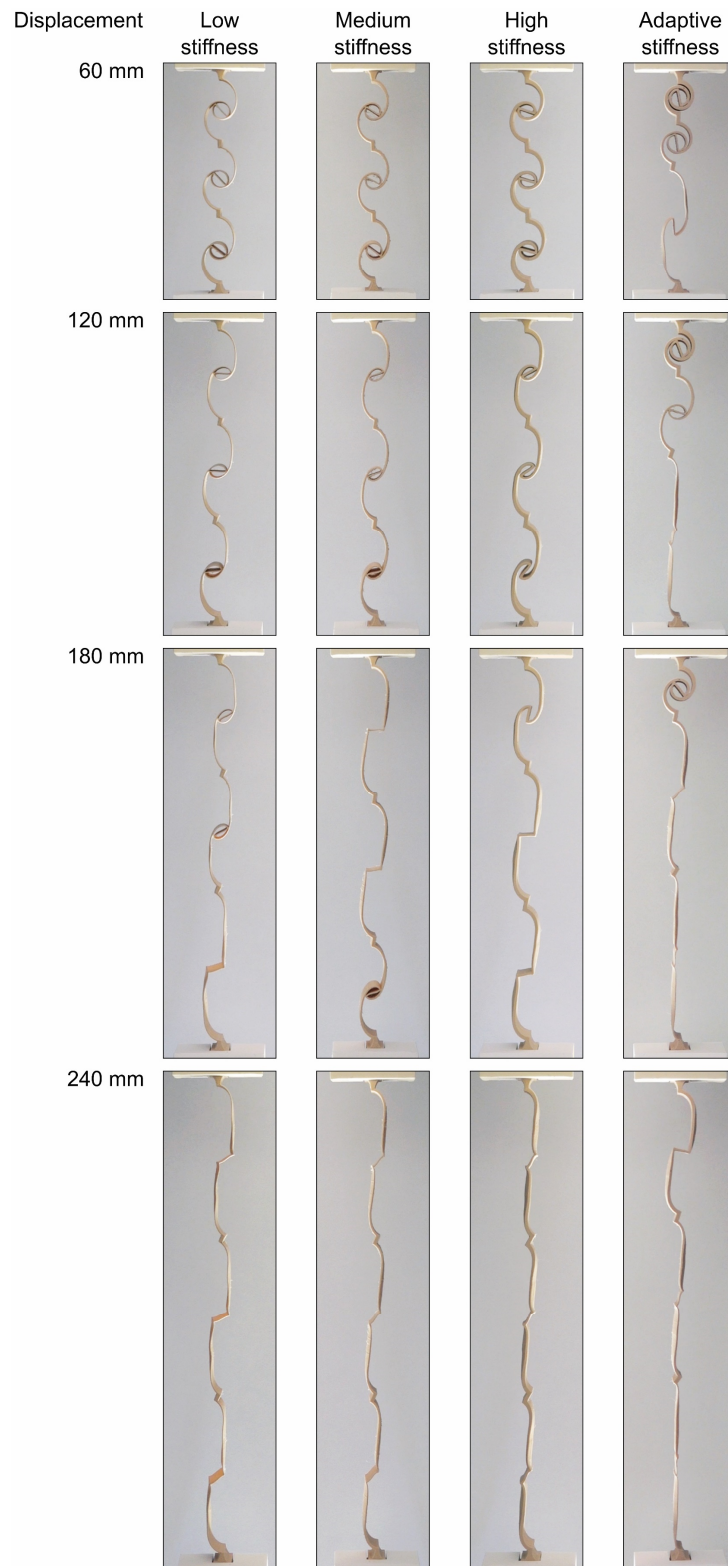

**Fig S1.** Tensile behavior of four structures consisted of geometrically different double-spirals. The figure shows the deformation of the low, medium, high, and adaptive stiffness structures, each extended to the same lengths.

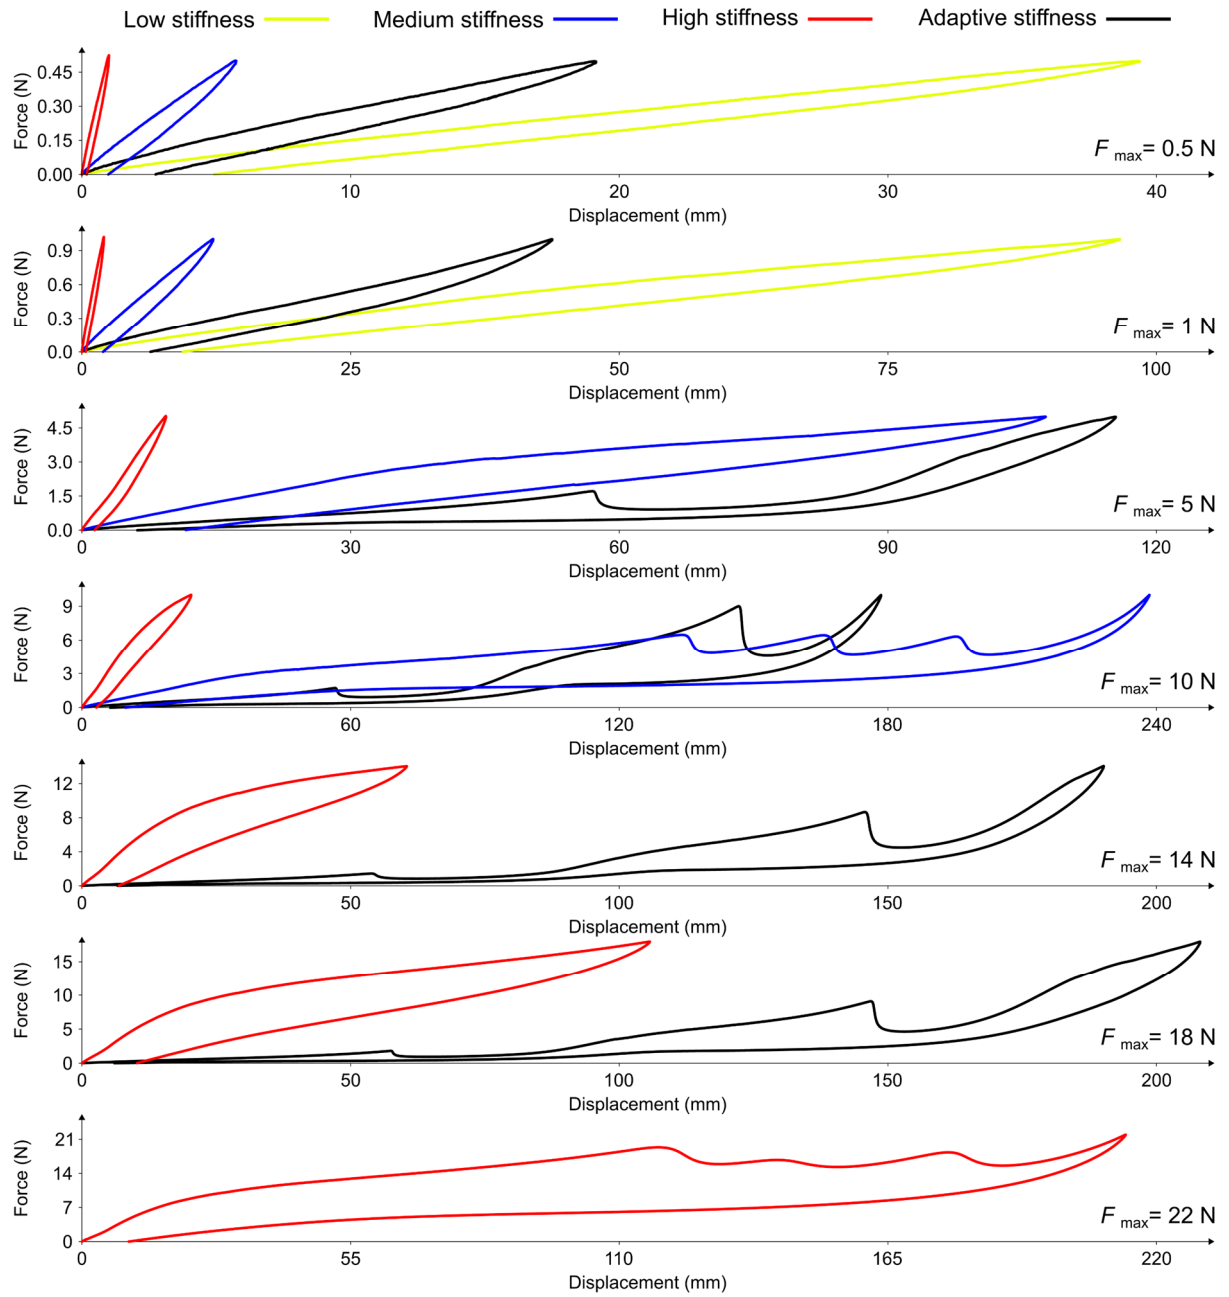

**Fig S2.** Mechanical behavior of the low, medium, high, and adaptive stiffness structures under tension. Force–displacement curves illustrate the hysteresis observed in the non-linear behavior of compliant double-spirals when subjected to tensile forces at a rate of 1 mm/s.

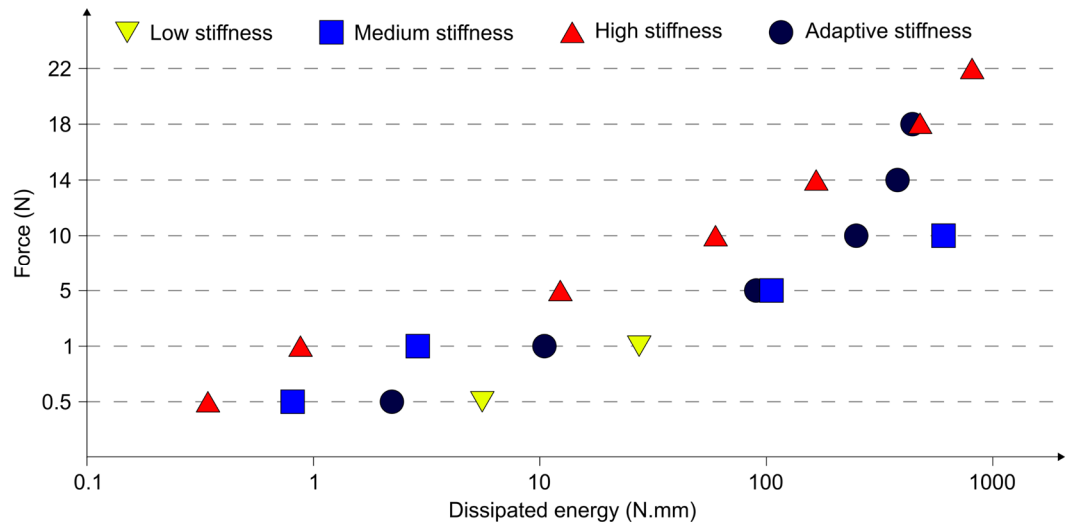

**Fig S3.** Comparing the amount of dissipated energy resulting from the deformation of four developed structures with low, medium, high, and adaptive stiffness, when subjected to the same tensile forces at a rate of 10 mm/s.
